# Supplementary figures and images for: Development of a Widely Applicable and Simple Prognostic Score for Patients with Acute-on-chronic Liver Failure
Source: PubMed Central journal article supplement — J Clin Transl Hepatol. 2022 Jan 18;10(5):867–78. doi: 10.14218/JCTH.2021.00328 (PMC9547268; doi:10.14218/jcth.2021.00328), 2022-01-18

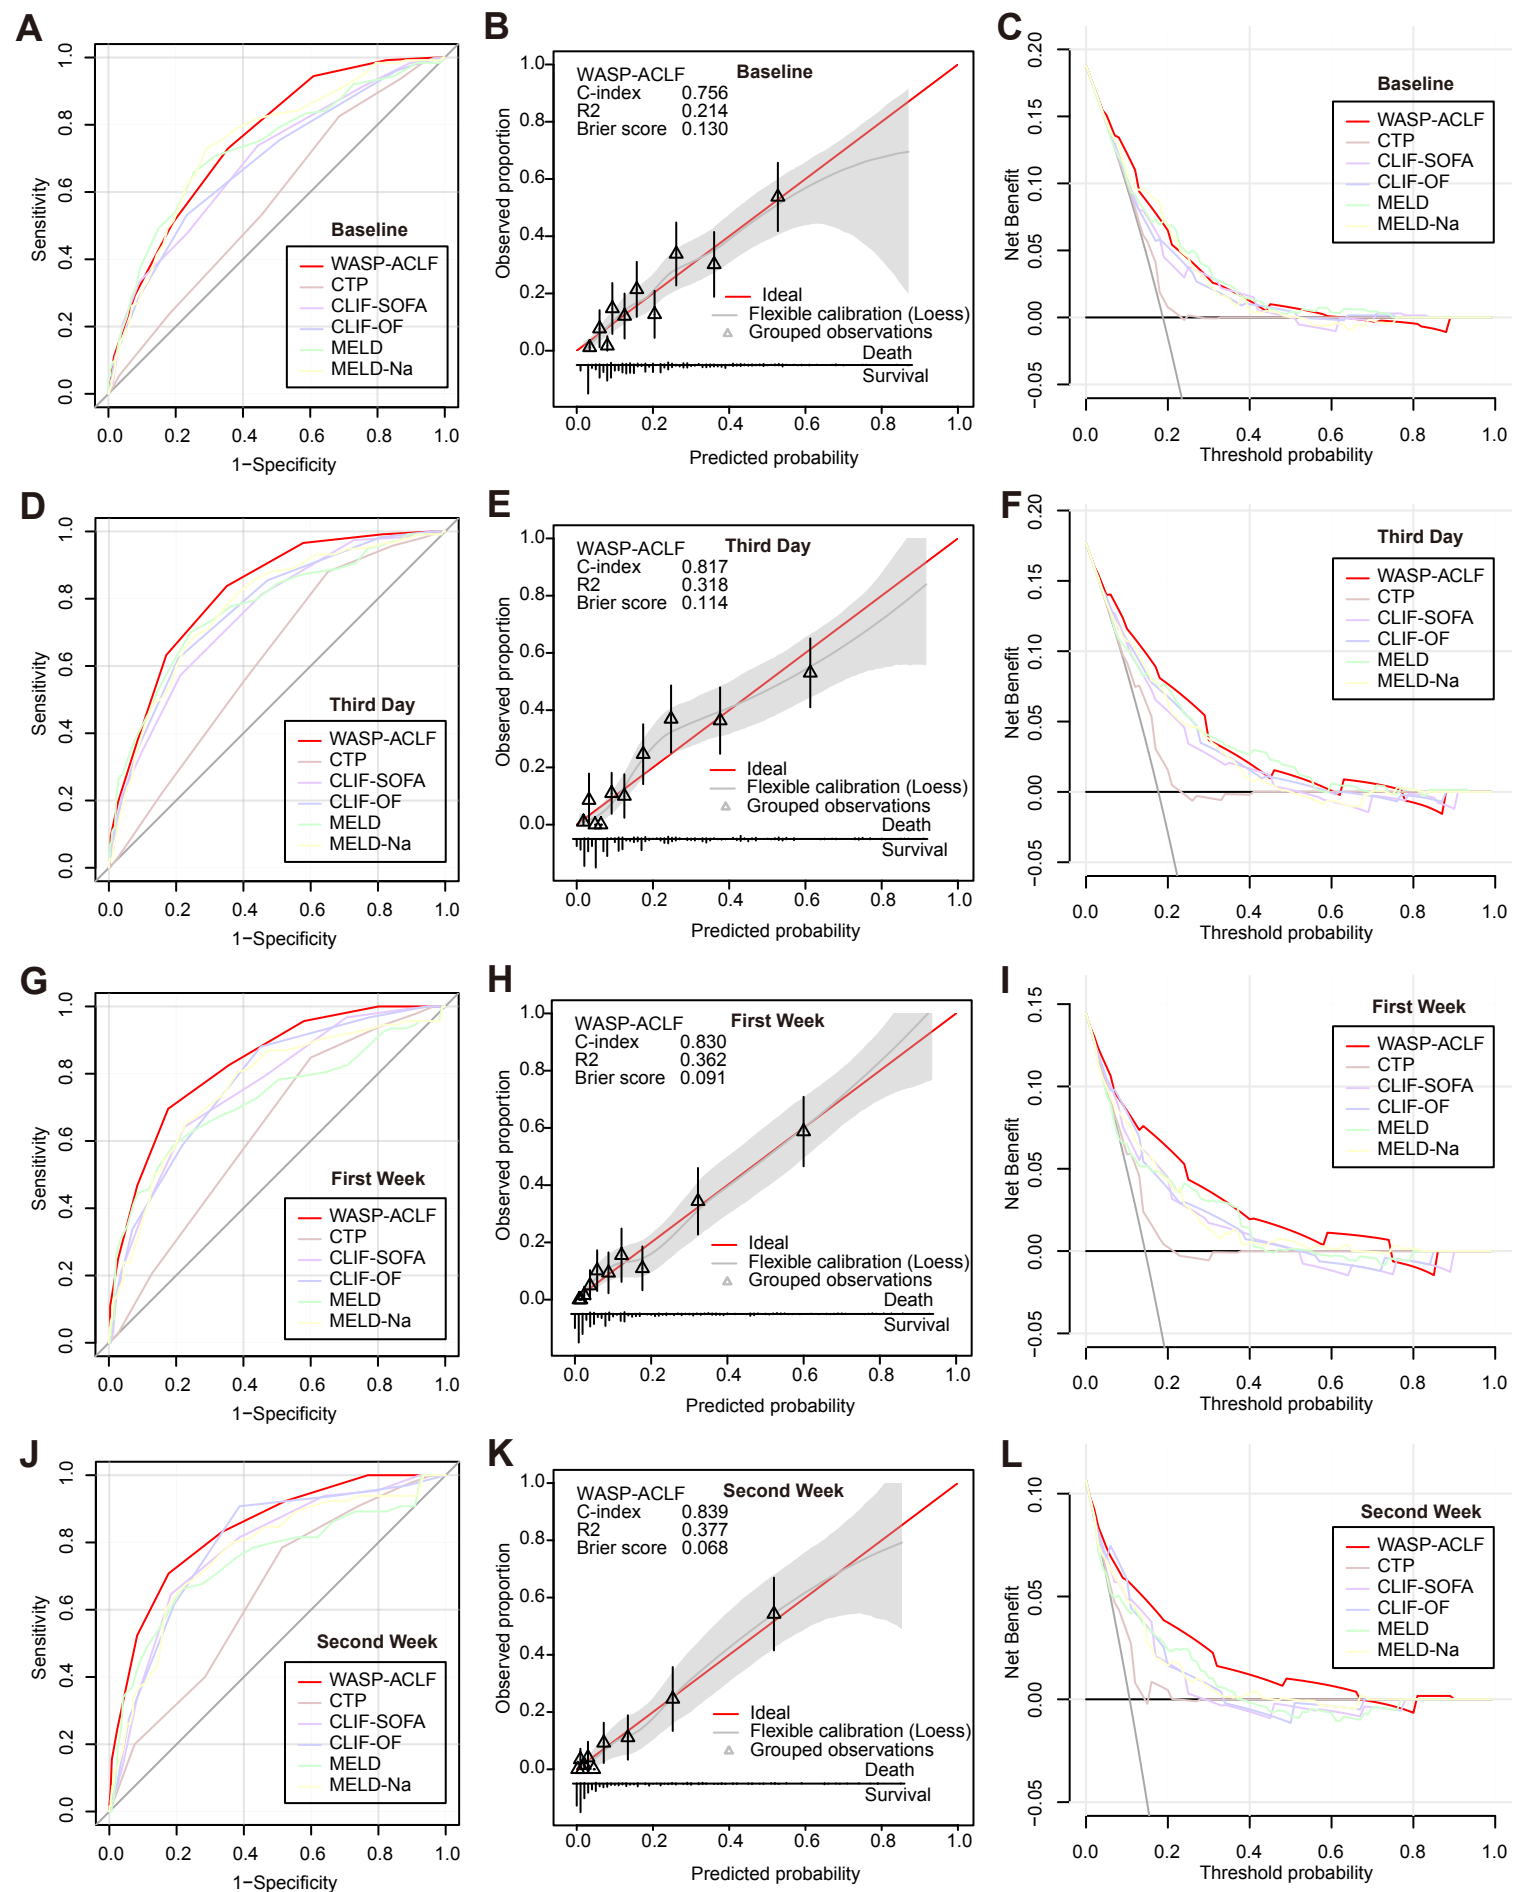

Supplement: JCTH-10-0867-s001.pdf [file JCTH-10-0867-s001.pdf]
